# Supplementary material for: Design and in vitro realization of carbon-conserving photorespiration
Source: PubMed Central journal article supplement (PMC6298115; doi:10.1073/pnas.1812605115), 2018-11-20
Supplement: pnas.1812605115.sapp.pdf [file pnas.1812605115.sapp.pdf]

# Supplemental Experimental Results, Materials, and Methods

Design and *in vitro* realization of carbon-conserving photorespiration

Devin L. Trudeau<sup>1‡</sup>, Christian Edlich-Muth<sup>2‡</sup>, Jan Zarzycki<sup>3</sup>, Marieke Scheffen<sup>3</sup>, Moshe Goldsmith<sup>1</sup>, Olga Khersonsky<sup>1</sup>, Ziv Avizemer<sup>1</sup>, Sarel J. Fleishman<sup>1</sup>, Charles A.R. Cotton<sup>2</sup>, Tobias J. Erb<sup>3</sup>, Dan S. Tawfik<sup>1\*</sup>, Arren Bar-Even<sup>2\*</sup>

<sup>1</sup>Department of Biomolecular Sciences, Weizmann Institute of Science, 234 Herzl Street, Rehovot 7610001, Israel

<sup>2</sup>Max Planck Institute of Molecular Plant Physiology, Am Mühlenberg 1, 14476 Potsdam-Golm, Germany

<sup>3</sup>Max Planck Institute for Terrestrial Microbiology, Karl-von-Frisch-Straße 10, D-35043 Marburg, Germany

## Supplemental Experimental Results

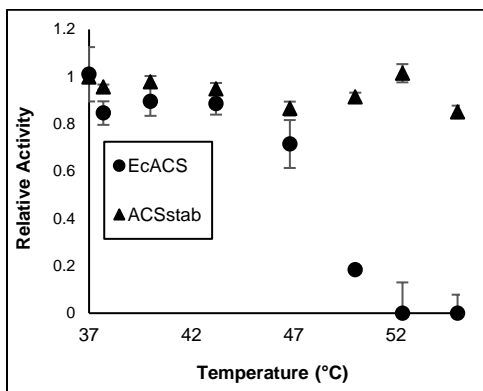

**Figure S1. Thermostability of *E. coli* ACS and its PROSS variant ACSstab.** *EcACS*, *E. coli* acetyl-CoA synthetase (Gene ID: 948572); ACSstab is a variant of *S. enterica* ACS engineered for higher stability with no active-site alterations; DNA and amino acid sequences are provided in **Table S4**. The rate of acetyl-CoA synthesis by *EcACS* and ACSstab were measured after a 10 min incubation at various temperatures. Reactions were carried out with 0.05  $\mu$ M enzyme, 0.5 mM acetate, 250  $\mu$ M CoA, 5 mM ATP, and activity was measured by titrating the unreacted CoA using DTNB. Shown are residual activities compared to a sample incubated at ambient temperature (average of three measurements and standard error).

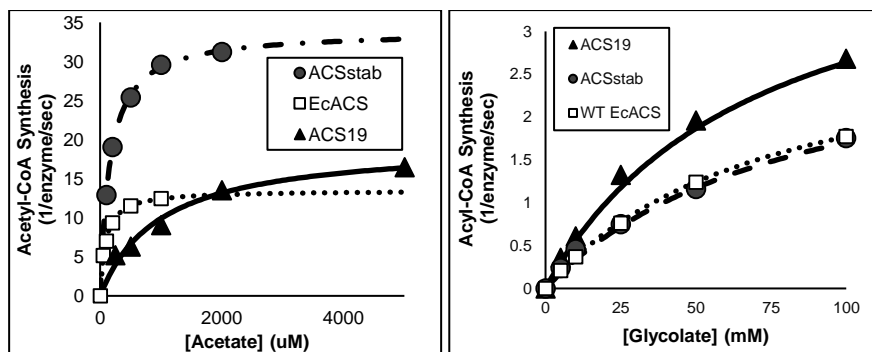

**Figure S2. Michaelis-Menten curves for the acyl-CoA synthetase variants.** *EcACS*, *E. coli* acetyl-CoA synthetase (Gene ID: 948572); ACSstab is a variant of *S. enterica* ACS engineered for higher stability with no active-site alterations. Engineered ACS19 is a variant of ACSstab with five active site mutations (V310I, S314A, Y355F, V386T, and F421C; DNA and amino acid sequences are provided in **Table S4**). Rates were measured by AMP production using a coupled assay with myokinase, pyruvate kinase, and lactate dehydrogenase. Reactions were carried out in 50 mM HEPES pH 8, 2.5 mM ATP, 5 mM  $MgCl_2$ , 1 mM DTT, 1 mM NADH, 2.5 mM phosphoenolpyruvate at 37 °C. ACS concentration was 0.05-0.1  $\mu$ M. Average of at least three independent experiments;  $\pm$  indicates standard error.

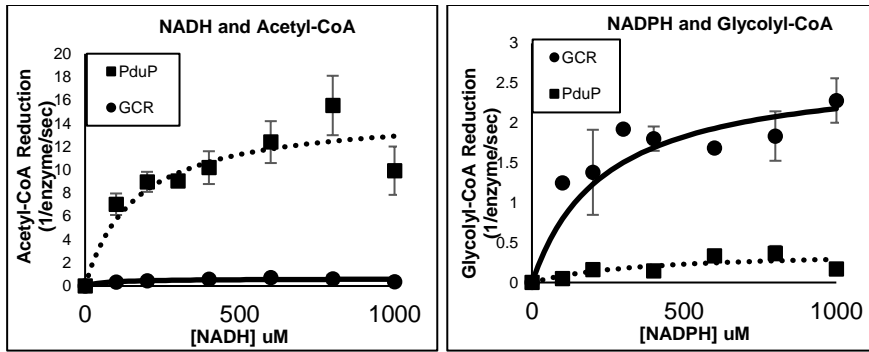

**Figure S3. Michaelis-Menten curves for PduP and GCR with either NADH or NADPH as cosubstrate.** PduP is *Rhodospseudomonas palustris* propionyl-CoA reductase, GCR is a variant of PduP with eight active site mutations: P222G, I257R, N261L, I280L, L326I, P327T, V329T, and L481H. Reactions were carried out in 50 mM HEPES pH 8.0, 5 mM ATP, 5 mM MgCl<sub>2</sub>, 0.05-0.50 μM enzyme, at 37 °C. Activity was measured by the rate of NAD(P)H oxidation (change in absorbance at 340 nm). Average of at least three independent experiments; ± indicates standard error.

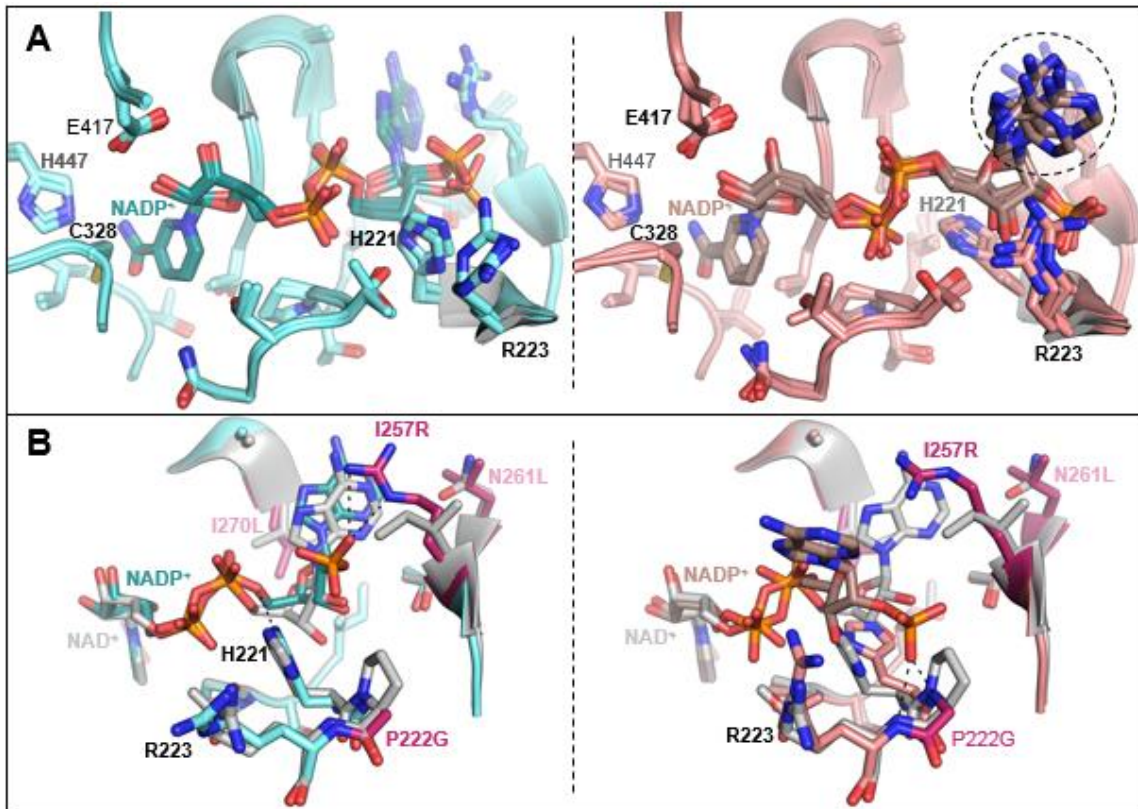

**Figure S4. Superpositions of the NADP binding sites observed in the crystal structure of the engineered GCR (PDB 6GVS).** **A)** Overlay of ‘canonical NADP binding mode’ observed in three out of 10 subunits of the GCR crystal structure (*left panel*; subunits A, G, I) compared with the ‘alternative NADP binding mode’ observed in 4 other subunits of the GCR crystal structure (*right panel*; subunits B,C,H,J). Note the varying orientations of the adenine ring (circled). **B)** Close-up on the adenosyl binding site superposing the crystal structures (RMSD of 0.276 Å over 424 Ca-atoms) of the engineered GCR with bound NADP (cyan) and the wild type enzyme (PduP) with bound NAD (PDB:5JFL; grey). The key mutations in the engineered GCR are highlighted in dark pink. In the canonical binding mode (cyan – left panel) the adenine ring of NADP assumes a similar position as for NAD in PduP (grey) and is held in place by a cation- $\pi$  interaction with the introduced R257 (I257 in wild-type PduP), which is also coordinating the 2'-phosphate group (dashed lines). In the alternative NADP binding mode (light pink – right panel), the adenine ring is pointing out of the binding pocket, although the 2'-phosphate group is coordinated by the backbone of G222 and R223 (dashed lines). This mode is likely promoted by the P222G mutation. Note that H221 adopts different conformations in both binding modes. Nonetheless, the catalytically functional part of NADP, the nicotinamide moiety, assumes the same position in both modes and corresponds well to that of NAD in wild type PduP.

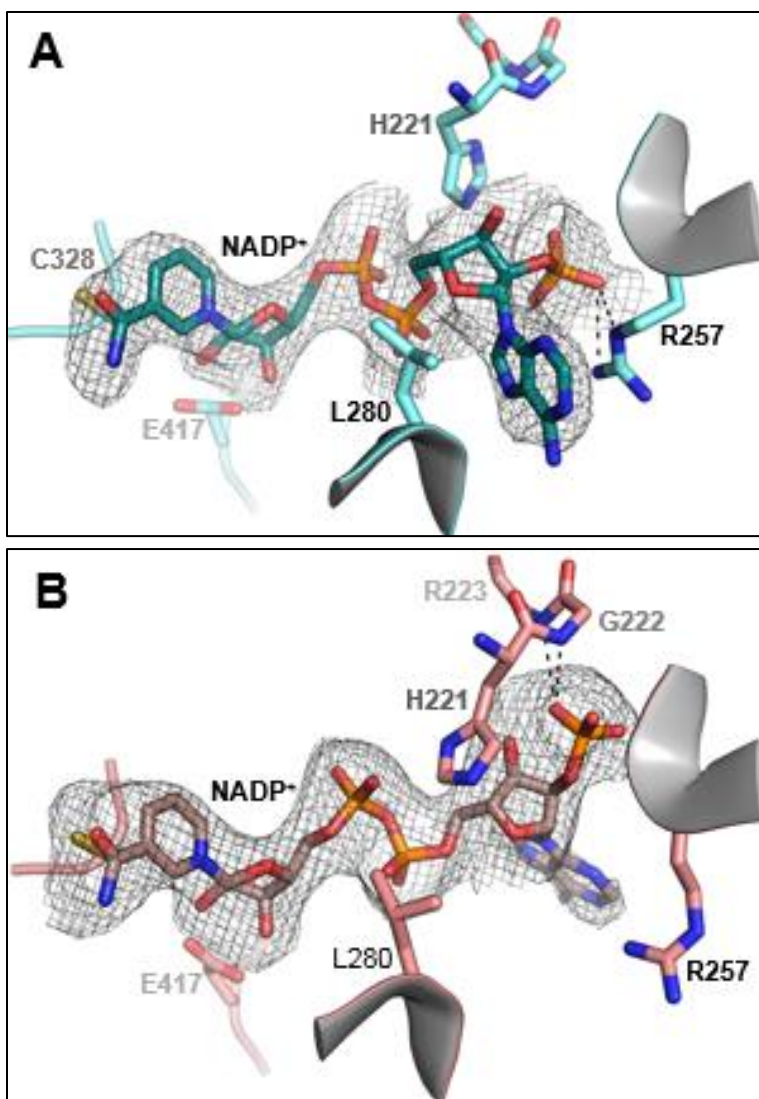

**Figure S5. Simulated annealing Fo-Fc electron density maps of NADP binding. A)** Omit map at  $2.5 \sigma$  for NADP in 'canonical binding mode'. The adenine ring is involved in a cation- $\pi$  interaction with the introduced R257, and also coordinates the 2'-phosphate group, as indicated by dashed lines. **B)** Omit map at  $1.8 \sigma$  for NADP in 'alternative binding mode'. The 2'-phosphate group is coordinated by interactions with the backbone of the introduced G222 and R223, indicated by dashes. The adenine ring is not coordinated resulting in flexibility and weak electron density.

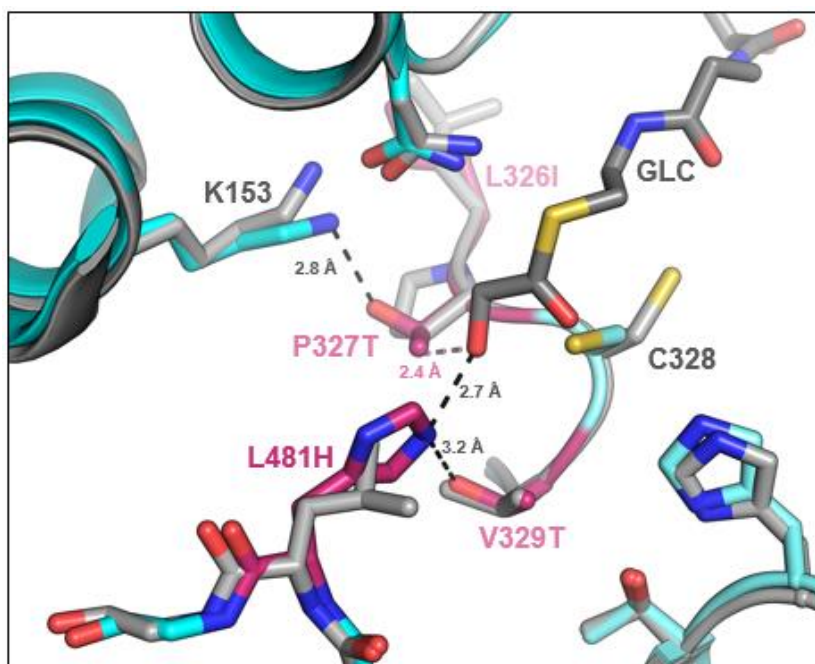

**Figure S6. The putative glycolyl-CoA mode of binding in the engineered GCR and wild type PduP.** The modeled glycolyl-CoA (GLC) in the engineered glycolyl-CoA reductase (cyan) is based on propionyl-CoA in the wild type PduP (PDB 5JFM; grey). Mutated residues are highlighted (dark pink). The terminal hydroxyl group of the glycolyl-CoA could participate in an H-bond with the introduced H481. In the GCR structure (apo-structure with respect to glycolyl-CoA), the introduced T327 engages in an H-bond with K153. However in its alternative rotamer conformation, T327 would be in an ideal distance (pink dashed line) and angle to accept an H-bond from glycolyl-CoA. The RMSD for the superposition of the two structures is 0.551 Å over 417 C $\alpha$ -atoms.

## Supplemental Experimental Materials

Unless otherwise noted, all reagents were purchased from Merck/Sigma-Aldrich (Darmstadt, Germany). All enzymes for cloning were purchased from New England Biolabs (Ipswich, MA, USA).

**Table S1. Materials used in this work.**

| Material                                        | Supplier                       | Location                                |
|-------------------------------------------------|--------------------------------|-----------------------------------------|
| 96-well deep plates                             | Axygen (Corning)               | Corning, New York, US                   |
| Acetic Acid, glacial                            | Bio-lab                        | Jerusalem, Israel                       |
| Acetonitrile, ULC/MS-grade                      | Bio-lab                        | Jerusalem, Israel                       |
| Adenosine 5'-triphosphate disodium salt hydrate | Sigma (Merck)                  | Darmstadt Germany                       |
| Agarose                                         | Hydragene                      | Hai Cang Industrial Park, Xiamen, China |
| Amicon Ultra 0.5mL 10K centrifugal filters      | Millipore/Merck                | Darmstadt Germany                       |
| Ammonia solution, 25%                           | Merck                          | Darmstadt Germany                       |
| Ammonium acetate                                | Merck                          | Darmstadt Germany                       |
| Ampicillin Sodium Salt                          | MP (Fisher Scientific)         | Hampton, NH, USA                        |
| Benzonase                                       | Merck                          | Darmstadt Germany                       |
| Chloramphenicol                                 | Sigma (Merck)                  | Darmstadt Germany                       |
| Coenzyme A                                      | Ark Pharm Inc                  | Arlington Heights, IL, USA              |
| DL-Dithiothreitol                               | Gold Biotechnology             | St Louis, MO, USA                       |
| D-Glyceraldehyde 3-phosphate solution           | Sigma (Merck)                  | Darmstadt Germany                       |
| 5,5'-Dithiobis(2-nitrobenzoic acid)             | Sigma (Merck)                  | Darmstadt Germany                       |
| Glucose                                         | J.T. Baker (Fisher Scientific) | Hampton, NH, USA                        |
| Glycerol                                        | J.T. Baker (Fisher Scientific) | Hampton, NH, USA                        |
| Glycolaldehyde dimer                            | Sigma (Merck)                  | Darmstadt Germany                       |
| Glycolic acid                                   | Sigma (Merck)                  | Darmstadt Germany                       |
| HEPES                                           | Apollo Scientific              | Denton, Manchester                      |
| HisTrap™ FF column 5mL                          | GE Healthcare                  | Little Chalfont, UK                     |
| Hydrochloric acid                               | Bio-lab                        | Jerusalem, Israel                       |
| Imidazole                                       | Glentham Life Science          | Corsham, UK                             |
| IPTG                                            | Inalco Pharmaceuticals         | San Luis Obispo, CA, USA                |
| Labcyler PCR Machine                            | Sensoquest                     | Göttingen, Germany                      |
| Liquid handling robot Precision 2000            | BioTek                         | Winooski, Vermont, USA                  |
| L-Lactate dehydrogenase from rabbit muscle      | Sigma (Merck)                  | Darmstadt Germany                       |
| Magnesium chloride                              | Sigma (Merck)                  | Darmstadt Germany                       |
| Methanol, ULC/MS-grade                          | Bio-lab                        | Jerusalem, Israel                       |
| Myokinase from rabbit muscle                    | Merck                          | Darmstadt Germany                       |
| Nickel-NTA beads                                | Adar Biotech                   | Rehovot, Israel                         |
| NAD <sup>+</sup> sodium salt                    | Sigma (Merck)                  | Darmstadt Germany                       |
| NADH disodium salt                              | Calbiochem (Merck)             | Darmstadt Germany                       |
| NADPH tetrasodium salt                          | Apollo Scientific              | Bredbury, UK                            |

|                                               |         |                         |                        |
|-----------------------------------------------|---------|-------------------------|------------------------|
| Phosphoenolpyruvic acid monopotassium salt    |         | Combi-blocks            | Combi-blocks           |
| PowerWave spectrophotometer                   | HT      | BioTek                  | Winooski, Vermont, USA |
| Propionic Acid                                |         | Combi-blocks            | San Diego, CA          |
| Protease inhibitor cocktail                   |         | Sigma (Merck)           | Darmstadt Germany      |
| Pyruvate kinase from rabbit muscle            |         | Sigma (Merck)           | Darmstadt Germany      |
| Ribulose-1,5-bisphosphate sodium salt hydrate |         | Sigma (Merck)           | Darmstadt Germany      |
| SDS-PAGE gel, 12%                             |         | Expedeon                | San Diego, CA, USA     |
| Sodium chloride                               |         | Bio-lab                 | Jerusalem, Israel      |
| Sodium hydroxide                              |         | Merck                   | Darmstadt Germany      |
| Tris                                          |         | Fisher Scientific       | Hampton, NH, USA       |
| UV-transparent microplate                     | 96-well | Greiner                 | Kremsmünster, Austria  |
| Water, ULC/MS-grade                           |         | Bio-lab                 | Jerusalem, Israel      |
| Water, Molecular Biology Grade                |         | Sigma (Merck)           | Darmstadt Germany      |
| Vibra-Cell sonicator                          |         | Sonics & Materials, Inc | Newton, CT, USA        |
| Vivaspin 20 ultrafiltration spin tubes        |         | GE Healthcare           | Little Chalfont, UK    |

## Supplemental Experimental Methods

### ***Protein expression and purification***

All enzymes described were His-tagged and purified on Ni-NTA beads. Isolated transformants were grown in 500 mL 2YT+0.1mg/mL ampicillin (pET vector) or 0.035 mg/mL chloramphenicol (ASKA vector) at 37 °C, 250 rpm, until an OD600 of 0.6. IPTG (0.4 mM) was used to induce gene expression at 16 °C, 250 rpm for 20 hours. The cells were harvested by centrifugation at 5,000g for 15 min at 4 °C, and the pellets were stored at -80 °C or directly used for protein purification.

Cell pellets were resuspended in 15 ml lysis buffer (50 mM HEPES pH 8, 50 mM NaCl, 2 mM MgCl<sub>2</sub>, 0.1 mM DTT, 10 units/mL benzonase, 1:500 dilute Sigma protease inhibitor cocktail without EDTA) and sonicated. The supernatant was collected after centrifugation at 10,000 g at 4 °C for 30 min. His-tagged proteins were purified with nickel-NTA beads. After sample loading, columns were washed with 10 column volumes of wash buffer, and eluted in 10 mL of elution buffer (wash buffer was 50 mM HEPES pH 8, 300 mM sodium chloride, and 35 mM imidazole, and elution buffer was 50 mM HEPES pH 8, 50 mM sodium chloride, and 150 mM imidazole). The purified proteins were buffer-exchanged to 50 mM HEPES pH 8, 100 mM sodium chloride, 2 mM MgCl<sub>2</sub> using Vivaspin 20 ultrafiltration spin tubes, and their concentrations were calculated by their extinction coefficients at 280 nm. Proteins were stored at -20 °C with 10 % glycerol.

### ***ACS deacylation with E. coli CobB***

Prior to use, ACS preparations were treated with *E. coli* deacetylase CobB, expressed and purified from the ASKA collection. Deacetylation conditions were: 1 mM NAD<sup>+</sup>, 50 mM HEPES pH 8, 100 mM NaCl, 2 mM MgCl<sub>2</sub>, 20 μM ACS, 4 μM CobB, 37°C overnight.



*E. coli* CobB was expressed and purified from a pCA24N plasmid under a PT5-lac promoter in the following manner: Transformed BL21(DE3) cells were grown overnight on LB-agar plates with chloramphenicol (0.035 mg/L) + 0.1 % glucose. Freshly grown, isolated colonies were used to inoculate starter cultures in 2YT + chloramphenicol (35 mg/l) + 0.1 % glucose and grown at 37 °C overnight. Starters were then used to inoculate (1:50) cultures and grown at room temperature to OD600nm  $\approx$  1. Protein expression was induced by the addition of IPTG (final, 1 mM) to the growth cultures. Cultures were then grown at 16 °C for 24 h, after which cells were harvested and kept frozen at -80 °C until purification. Frozen cells were defrosted and lysed by re-suspension in 20 mM Tris-HCl pH 8, NaCl 250 mM, 0.4 mg/ml Lysozyme, 1 mM DTT, 1:500 dilute Sigma protease inhibitor cocktail without EDTA, 25 U/ml Benzonase Nuclease. The lysate was clarified by centrifugation (11,000 g, 4 °C, 30 min) and loaded on a 5ml HisTrap™ FF column pre-equilibrated with 20 mM Tris-HCl pH 8, 350 mM NaCl, 35 mM imidazole). Following an extensive (5 c.v) wash, the protein was eluted using 5 c.v of 20 mM Tris-HCl pH 8, 100 mM NaCl, 250 mM imidazole pH 8. Eluted fractions containing the purified CobB were pooled, dialyzed with 50 mM Tris-HCl pH 8, 100 mM NaCl, 20% Glycerol and kept frozen at -20 °C until use. Protein concentrations were examined by absorbance at 280 nm and by PAGE-gel densitometry using BSA for calibration.

#### **Enzyme kinetics: Acyl-CoA Synthetase**

A coupled assay was applied monitoring the conversion of ATP to AMP (1). Briefly, a 200  $\mu$ L reaction mixture containing 50 mM HEPES pH8, 5 mM MgCl<sub>2</sub>, 1 mM CoA, 1 mM DTT, 2.5 mM ATP, 0.6 mM NADH, 2.5 mM phosphoenolpyruvate, 15 units/mL pyruvate kinase, 23 units/mL lactate dehydrogenase, 25 units/mL myokinase, 0.05-0.1  $\mu$ M ACS enzyme, and various concentrations of carboxylic acids. Reactions were initiated by addition of the reaction mix to substrate in UV-transparent 96-well microplate and absorbance at 340 nm was monitored at 37 °C for 10 min.

We also applied an endpoint assay based on detection of unreacted CoA using 5,5'-Dithiobis(2-nitrobenzoic acid) (DTNB). 100  $\mu$ L reactions were carried out with 0.05-0.1  $\mu$ M enzyme, 250-500  $\mu$ M CoA, 5 mM ATP, in 50mM HEPES pH 8, 5 mM MgCl<sub>2</sub>, for 10 min at 37°C. Activity was measured by titrating the unreacted CoA using 100  $\mu$ L of DTNB solution (2 mM DTNB, 50 mM HEPES pH 7.5) and absorbance was determined at 412 nm. There was qualitative agreement between the coupled assay and the endpoint assay.

#### **Enzyme kinetics: Acyl-CoA reduction**

The oxidation of NAD(P)<sup>+</sup> to NAD(P)H was monitored. Briefly, a 200  $\mu$ L reaction mixture containing 50 mM HEPES pH 8.0, 5 mM MgCl<sub>2</sub>, 1 mM DTT, and various concentrations of acyl-CoA and NAD(P)H was incubated with enzyme (0.05-0.5  $\mu$ M) in UV-transparent 96-well microplate and absorbance at 340 nm was monitored at 37°C for 10 min. For combined assays (the reduction module), ACS variants, CoA, carboxylic acids, and ATP were added, and reduction was monitored by NADPH consumption.

#### **Screening of mutant acetyl-CoA synthetase libraries**

Plasmids encoding ACSstab library variants were transformed into electrocompetent *E. coli* BL21 (DE3) cells harboring a pCA24N plasmid with CobB from the ASKA collection. Individual transformants were picked and grown in LB-agar plates with ampicillin (0.1 mg/mL) + chloramphenicol (0.035 mg/mL) + 0.1% glucose. Overnight cultures were used to inoculate (1:100 dilution) fresh media (0.5 ml), grown at room temperature to OD600nm

≈ 0.6, induced with 1 mM IPTG, and grown at room temperature overnight. Cells were pelleted and lysed by resuspension in 300  $\mu$ L/well of lysis buffer (50 mM HEPES pH 7.5, 0.1 M NaCl, 0.6 mg/ml lysozyme, 2 mM  $MgCl_2$  and 25 U/mL benzonase) and shaking (1200 rpm) for 1h at 37°C. Lysates were pelleted by centrifugation and kept at 4°C before screening. Forty microliters of clear cell lysate from each well were transferred to a 96-well ELISA plate using an automated liquid handling robot and mixed with 60 $\mu$ L of a buffered glycolate solution (50 mM HEPES pH 7.5, 2 mM  $MgCl_2$ , 10 mM ATP, 0.5 mM CoA, 2 mM Glycolate) for 10 min at 37°C with shaking at 600 rpm. Unreacted CoA was detected with the DTNB assay. 100  $\mu$ L of DTNB solution (2 mM DTNB, 50 mM HEPES pH 7.5) was added per well and absorbance was determined at 412 nm. Lysates of cells expressing ACSstab and lysis buffer itself, were used as negative controls.

#### **Screening of mutant acyl-CoA reductase libraries**

Libraries were cloned and transformed directly into electrocompetent *E. coli*/BL21 (DE3) and plated on LB plates (0.1 mg/mL ampicillin). Individual transformants were picked and grown in 500  $\mu$ L 2YT in 96-well deep-well plates at 37°C overnight. 100  $\mu$ L of overnight cultures was transferred to a new 96-well deep-well plates and 400  $\mu$ L of 2YT media with 0.1 mg/mL ampicillin were added and incubated at 37°C, 1000 rpm shaking for 4h. IPTG was added to 400  $\mu$ M and the temperature was reduced to 16°C for 16 h. Cells were spun down and lysed with 300  $\mu$ L/well lysis buffer (50 mM HEPES pH 8, 100 mM NaCl, 2 mM  $MgCl_2$ , 0.6 mg/mL lysozyme, 10 U/mL benzonase) at 37°C for 1h. After centrifugation, the clarified lysate (100 $\mu$ L) was added to 100 $\mu$ L reaction mixture (50mM HEPES pH 8, 5 mM  $MgCl_2$ , 1 mM DTT, various concentrations of acyl-CoA and NAD(P)H), and absorbance at 340 nm was monitored at 37°C for 10 min in UV-transparent 96-well plates. Lysates of cells expressing RpPduP and lysis buffer itself were used as negative controls.

#### **Thermostability assay of acetyl-Coenzyme A synthetases**

ACS samples (0.1 $\mu$ M) were incubated at varied temperatures in a gradient PCR machine for 10min in 50 $\mu$ L volume, then cooled on ice and incubated with 500  $\mu$ M acetate, 5 mM ATP, and 250  $\mu$ M CoA in a total volume of 100  $\mu$ L (50 mM HEPES pH 8, 5 mM  $MgCl_2$ ), for 10 min at 37°C. Activity was detected with DTNB assay: To measure the concentration of unreacted CoA, 100  $\mu$ L of 1 mM DTNB solution in 50 mM HEPES pH 8 was added and absorbance was measured at 412 nm in a PowerWave HT spectrophotometer (BioTek).

**Chemical synthesis of glycolyl-CoA.** Glycolyl-CoA was synthesized from glycolate and CoA using carbonyldiimidazole (CDI). 42.2 mg CDI was dissolved in 2 mL dry tetrahydrofuran (THF). 80 mg glycolate was added and incubated for 30 min at room temperature. CoA (80mg) was dissolved in 1 mL of 0.5 M  $NaHCO_3$  pH 7.4, added to the stirred THF solution and incubated for 12 h on ice and resulting glycolyl-CoA was used for library screening or purified. For the latter the reaction mixture was diluted with 9 mL of 0.5 M  $NaHCO_3$  pH 7.4 and acidified to a pH of 3 by adding formic acid. The mixture was stirred and degassed under vacuum for 45 min at 4°C. The mixture was then applied to a preparative Agilent 1260 Infinity HPLC with a Phenomenex Gemini 10 $\mu$ m NX-C18 110 Å column. Chromatographic separation was achieved using 25 mM ammonium formate pH 4.2 with a methanol gradient at a flow rate of 25 mL min<sup>-1</sup>: 0 min 1% methanol; 0.5 min 1% methanol, 10 min 30% methanol. Glycolyl-CoA fractions were pooled, flash-frozen in liquid nitrogen, and lyophilized. Glycolyl-CoA was approximately 90% pure as judged by HPLC. Purified glycolyl-CoA was used for kinetics.

#### **Crystallization, and structure determination of the glycolyl-CoA reductase.**

*Heterologous expression of the glycolyl-CoA reductase* - *E. coli* BL21 (DE3) cells containing the expression plasmid for the His<sub>6</sub>-tagged GCR were grown in Terrific Broth.

Ampicillin was added to concentrations of 100 µg/ml. The cultures were grown at 37°C to an OD<sub>600nm</sub> of 0.8 and induced with 0.25 mM IPTG. After induction the cultures were cooled to 25°C and grown overnight.

*Purification, crystallization, and structure determination of the glycolyl-CoA reductase* - Cells that expressed GCR were resuspended in a 3-fold volume of 50 mM MOPS/KOH buffer (pH 7.5) containing 250 mM KCl (buffer A) with 0.1 mg DNase I per mL. The cells were lysed by passage through a microfluidizer (LM10, Microfluidics Corp., USA) at 110 MPa. The cell lysates were ultra centrifuged for 1 h at 100,000×g at 4°C and the supernatants were applied at a flow rate of 1 mL min<sup>-1</sup> to a 1 mL HisTrap FF column (GE Healthcare) that had been equilibrated with buffer A. The column was washed with 60 mM imidazole in buffer A and GCR was eluted with 500 mM imidazole in buffer A. Fractions containing GCR were pooled and concentrated using a Amicon Ultra-4 Centrifugal Filter Unit (EMD Millipore) with a 100 kDa pore size. The sample was then applied to a 120 mL gel filtration column (HiLoad 16/600 Superdex 200 pg, GE Healthcare), equilibrated with 20 mM MOPS/KOH pH 7.5 buffer containing 100 mM KCl. The protein was kept on ice over night before crystal plates where set up.

For co-crystallization of the purified His<sub>6</sub>-tagged GCR in the presence of NADP<sup>+</sup> the enzyme (6.5 mg mL<sup>-1</sup>) was mixed with 0.2 M potassium citrate/KOH pH 8.4, 20% (w/v) PEG 3350, and supplemented with NADP<sup>+</sup> from a 30 mM stock in a ratio of 2µL: 2µL: 1µL (enzyme: crystallization buffer: substrate). Thick needle shaped crystals appeared overnight and the over the course of two days. Crystals were soaked briefly with mother liquor supplemented with 30 % (v/v) ethylene glycol, and 10 mM NADP<sup>+</sup>, before freezing in liquid nitrogen. X-ray diffraction data were collected at the beamline ID30B of the ESRF (Grenoble, France) and at the beamlines P13 of the DESY (Hamburg, Germany).

The data was processed with the XDS software package(2). The structures were solved by molecular replacement using the structure of the wild type propionaldehyde dehydrogenase from *Rhodopseudomonas palustris* (3) (PDB 5JFL) as the search model. The molecular replacement was carried out using Phaser of the Phenix software package(4) and refined with Phenix.Refine. Additional modeling, manual refining and ligand fitting was done in COOT(5). Final positional and B-factor refinements, as well as water-picking for the structure were performed using Phenix.Refine. The GCR structure model was deposited at the Protein Bata Bank in Europe (PDBe) under the PDB ID 6GVS.

**Table S2. X-ray data collection and refinement statistics for the GCR structure**

|                                                     |                                    |
|-----------------------------------------------------|------------------------------------|
| Beam line                                           | ID30B ESRF, Grenoble, France       |
| PDB ID                                              | 6GVS                               |
| Ligands                                             | NADP <sup>+</sup> , K <sup>+</sup> |
| Wavelength                                          | 0.9762                             |
| Resolution range (Å)                                | 39.13 - 2.58 (2.72 - 2.58)         |
| Space group                                         | C 1 2 1                            |
| Unit cell dimensions                                |                                    |
| <i>a b c</i> (Å)                                    | 362.20 123.18 165.10               |
| <i>α β γ</i> (°)                                    | 90.00 109.25 90.00                 |
| Total reflections                                   | 853804 (123635)                    |
| Unique reflections                                  | 212592 (30472)                     |
| Multiplicity                                        | 4.6 (4.7)                          |
| Completeness (%)                                    | 98.9 (97.8)                        |
| Mean <i>I</i> / <i>σ</i> ( <i>I</i> )               | 7.6 (1.5)                          |
| <i>R</i> <sub>merge</sub>                           | 0.130 (0.969)                      |
| <i>R</i> <sub>pim</sub>                             | 0.074 (0.548)                      |
| <i>CC</i> <sub>1/2</sub>                            | 0.993 (0.598)                      |
|                                                     |                                    |
| <b>Refinement</b>                                   |                                    |
| <i>R</i> <sub>work</sub> / <i>R</i> <sub>free</sub> | 0.1915 / 0.2098                    |
| Number of non-hydrogen atoms                        | 33944                              |
| macromolecules                                      | 32970                              |
| ligands                                             | 470                                |
| solvent                                             | 504                                |
| RMS(bonds)                                          | 0.009                              |
| RMS(angles)                                         | 0.724                              |
| Ramachandran                                        |                                    |
| favored (%)                                         | 97.79                              |
| allowed (%)                                         | 2.21                               |
| outliers (%)                                        | 0.00                               |
| Average B-factor                                    | 58.08                              |
| macromolecules                                      | 57.71                              |
| ligands                                             | 86.68                              |
| solvent                                             | 55.06                              |

Values in parentheses are for highest-resolution shell.

**LC-MS pathway analysis.** 100 µL reaction mix was cleared of protein using Amicon Ultra 0.5 mL 10K centrifugal filters. Samples were run on a Waters e2695 Separation module with a Phenomenex Luna-NH<sub>2</sub> column (3µm, 100 Å) and detected on a Waters Acquity QDA system. Chromatographic separation used the following gradient conditions at a flow rate of 0.25 mL/min (acetonitrile = A, 10 mM ammonium acetate pH 10 = B) : 0 min 85% A, 15% B; 7 min 5% A, 95% B; 14 min 5% A, 95% B; 15 min 85% A 15% B; 17 min 85% A 15% B. Ribulose-1,5-bisphosphate (>99.0% purity) was used as a standard.

**Table S3. Primers used in this work.**

| <b>Primer name</b> | <b>Sequence</b>                       | <b>Purpose</b>                                  |
|--------------------|---------------------------------------|-------------------------------------------------|
| T7SeqFWD           | TAATACGACTCACTATAGGG                  | General sequencing primer for pET vector        |
| T7SeqREV           | GCTAGTTATTGCTCAGCGG                   | General sequencing primer for pET vector        |
| AdaptorFWD         | GACGAGGTGATCAACACCCAT                 | Adaptor sequence for synthesized genes          |
| AdaptorREV         | ATCAGCGACGAGAGCACCCCTCGAG             | Adaptor sequence for synthesized genes          |
| NADPHlib-1FWD      | CAGCCCGCATNSACGCGCCC                  | Mutagenic primer for PduP NADPH switch          |
| NADPHlib-1REV      | GGGCGGGTCNATGCGGGCTG                  | Mutagenic primer for PduP NADPH switch          |
| NADPHlib-2FWD      | GAAGCCCTCGANAGAGAACRMCAACGCCATG       | Mutagenic primer for PduP NADPH switch          |
| NADPHlib-2REV      | CATGGCGTTGKYGTTCTCTNTCGAGGGCTTC       | Mutagenic primer for PduP NADPH switch          |
| NADPH.N263XFWD     | CACCNKGCCATGATGGCGC                   | Mutagenic primer for PduP NADPH switch          |
| NADPH.N263XREV     | GCGCCATCATGGCMNNGGTG                  | Mutagenic primer for PduP NADPH switch          |
| NADPH.I282XFWD     | CGGCCCCGCCNNKGTCAAGGCG                | Mutagenic primer for PduP NADPH switch          |
| NADPH.I282XREV     | CGCCTTGACMNNGCGGGGCCG                 | Mutagenic primer for PduP NADPH switch          |
| PduPglycFWD        | CTTCGACAACAACVTRSHRTGCRYTGCCGAGAAGGAG | Mutagenic primer for PduP Glycolyl-CoA activity |
| PduPglycREV        | CTCCTTCTCGGCARYGCAYDSYABGTTGTTGTCGAAG | Mutagenic primer for PduP Glycolyl-CoA activity |

|                 |                               |                                                 |
|-----------------|-------------------------------|-------------------------------------------------|
| PduPglycL483FWD | CTTATGCGGGGNNSGGCGCCGGCGGCG   | Mutagenic primer for PduP Glycolyl-CoA activity |
| PduPglycL483REV | CGCCGCGGCGCCSNCCCCGCATAAG     | Mutagenic primer for PduP Glycolyl-CoA activity |
| PduPglycA298FWD | GATCGGCGCCGGCNNSGGCAATCCGCCCG | Mutagenic primer for PduP Glycolyl-CoA activity |
| PduPglycA298REV | CGGGCGGATTGCCSNNGCCGGCGCCGATC | Mutagenic primer for PduP Glycolyl-CoA activity |
| PduPglycN199FWD | CGCCGACCACCNNSCCGACGGAAACC    | Mutagenic primer for PduP Glycolyl-CoA activity |
| PduPglycN199REV | GGTTCCGTCCGGSNNGGTGGTCCGGCG   | Mutagenic primer for PduP Glycolyl-CoA activity |

**Gene and amino acid sequences**

**>E. coli ACS**

**ASKA clone JW4030**

**>E. coli FsaA**

**ASKA clone JW5109**

**>E. coli FsaB**

**ASKA clone JW3918**

**>E. coli KdsD**

**ASKA clone JW3164**

**>E. coli GutQ**

**ASKA clone JW5431**

**>Rhodobacter sphaeroides Phosphoribulokinase DNA**

ATGAGCAAGAAGCATCCCATCATCTCGGTACGGGCTCGTCCGGCGCGGGCACCTCGACGGTGAA  
GCACACGTTTCGACCAGATCTTCCGGCGCGAGGGGGTCAAGGCGGTCTCGATCGAGGGCGACGCCT  
TCCACCGCTTCAACCGCGCCGACATGAAGGCCGAGCTGGACCGGCGCTATGCGGCGGGCGACGCC  
ACCTTCTCGACTTCTCCTACGAGGCGAACGAGCTGAAGGAGCTGGAGCGGTCTTCCGCGAGTA  
CGGCGAGACCGGGCAGGGGCGGACGCGGACCTACGTCCATGACGATGCCGAAGCGGCGCGCACCG  
GCGTGGCGCCCGGCAACTTACCCGACTGGCGCGACTTCGACAGCGACAGCCACCTGCTGTTCTAC  
GAGGGGTTGCACGGGGCGGTGGTGAACAGCGAGGTCAATATCGCGGGGCTGGCCGACCTCAAGAT  
CGGCGTGGTTCGGTTCATCAACCTCGAATGGATCCAGAAGATCCACCGCGACCGCGGACCCGCG  
GTTACACGACCGAGGCGGTACCCGACGTGATCCTGCGCCGGATGCATGCCTACGTTCACTGCATC  
GTGCCGCAATTCTCGCAGACCGACATCAACTTCCAGCGCGTGCCGGTGGTGGATACCTCGAACCC  
CTTCATCGCGCGCTGGATCCCCACCGCCGACGAGAGCGTGGTGGTGGATCCGTTTCCGCAATCCGC  
CGGGATCGACTTCCCCTATCTCACCTCGATGATCCACGGCTCGTGGATGAGCCGCGCCAATTCC

ATCGTGGTGCCCGCAACAAGCTGGACCTCGCGATGCAGCTGATCCTGACACCGCTGATCGACCG  
GGTCGTCCGAGAGAGCAAGGTGGCCCTCGAGCACCACCACCACCACCCTGA

**>Rhodobacter sphaeroides Phosphoribulokinase AA**

MSKKHPIISVTGSSGAGTSTVKHTFDQIFRREGVKAVSIEGDAFHRFNADMKAELDRRYAAGDA  
TFSHFSYEANELKELERVFREYGETGQGRTRTYVHDDAEAARTGVAPGNFTDWRDFDSDSHLLFY  
EGLHGAVVNSEVNIAGLADLKIIGVVPVINLEWIQKIHRDRATRGTTEAVTDVILRRMHAYVHCI  
VPQFSQTDINFQRFVVDTSNPFARWIPTADESVVIRFRNPRGIDFPYLTSMIHGSWMSRANS  
IVVPGNKLDLAMLQILITPLIDRVVRESKVALEHHHHHH\*

**>ACSstab DNA**

ATGGCTCAGACCCACAAACACCCGGTTCGCCGAACATCGCGGCGAACGCGTGGATCAACCCGGA  
ACAGTACGAAGCGATGTACAAACAGTCTATCAACGACCCGGACACCTTCTGGCGTGAACAGGGTA  
AAATCCTGGACTGGATCAAACCGTACACCCGTGTAAAAACACCTCTTTCGAACCGGGTAACGTT  
TCTATCCGTTGGTACGAAGACGGTACCCTGAACCTGGCGTACAACGCCTGGACCGTACCTGGA  
AGAACGTGGTGACCAGACCGCGATCATCTGGGAAGGTGACGACCCGTCTGAATCTCGTCACATCA  
CCTACCGTGAACCTGCACCGTGACGTTTGCCTTTCGCGAACGTTCTGAAAGCGCTGGGTATCAAA  
AAAGGTGACGTTGTTGCGATCTACATGCCGATGGTTCGGAAGCGCGGTTGCGATGCTGGCGTG  
CGCGCGTATCGGTGCGATCCACTCTGTTATCTTCGGTGGTTTCTCTCCGGAAGCGGTTGCGGGTC  
GTATCATCGACTCTAACTCTCGTCTGGTTATCACCGCGGACGAAGGTGTTCTGTCGGGTCGTTCT  
ATCCCGCTGAAAAAGAACGTTGACGAAGCGCTGAAAAACCCGAACGTTACCTCTGTTGAACACGT  
TATCGTTTTCAAACGTACCGGTGGTGACATCGACTGGCAGGAAGTTCGTGACCTGTGGTGGCGTG  
ACCTGATCGAAAAAGCGTCTCCGGAACACCAGCCGGAACCGATGAACGCGGAAGACCCGCTGTTT  
ATCCTGTACACCTCTGGTTCTACCGGTAAACCGAAAGGTGTTCTGCACACCACCGGTGGTTACCT  
GGTTTACGCGGCGACCACCTTCAAATACGTTTTTCGACTACCACCCGGGTGACATCTACTGGTGCA  
CCGCGGACGTTGGTTGGGTTACCGGTCACTCTTACCTGCTGTACGGTCCGCTGGCGTGGCGTGCG  
ACCACCCTGATGTTCGAAGGTGTTCCGAACTGGCCGACCCCGTCTCGTATGGCGCAGGTTGTTGA  
CAAACACCAGGTTAACATCCTGTACACCGCGCCGACCGCGATCCGTGCGCTGATGGCGGAAGGTG  
ACAAAGCGATCGAAGGTACCGACCGTTCTTCTCTGCGTATCCTGGGTTCTGTTGGTGAACCGATC  
AACCCGGAAGCGTGGGAATGGTACTGGAAAAAATCGGTAACGAACGTTGCCCGGTTGTTGACAC  
CTGGTGGCAGACCGAAACCGGTGGTTTCATGATCACCCCGCTGCCGGGTGCGATCGAACTGAAAC  
CGGGTTCGCGACCCGTCGGTTCTTCGGTGTTCAGCCGGCGCTGGTTGACAACGAAGGTAACCCG  
CAGGAAGGTGCGACCGAAGGTAACCTGGTTATCACCGACTCTTGGCCGGGTGAGGCGCGTACCCT  
GTACGGTGACCACGAACGTTTTCGAACAGACCTACTTCTCTACCTTCAAAGGTATGTACTTCTCTG  
GTGACGGTGC CGCTCGTGACGAAGACGGTTACTACTGGATCACCGGTCGTGTTGACGACGTTCTG  
AACGTTTCTGGTACCCTGTTGGTACC CGGAAATCGAATCTGCGCTGGTTGCGCACCCGAAAT  
CGCGGAAGCGCGGTTGTTGGTATCCCGCACGACATCAAAGGTCAGGCGATCTACGCGTACGTTA  
CCCTGAACCACGGTGAAGAACCGTCTCCGGAACGTACAAAGAAGTTCGTAACCTGGGTTGTTAA  
GAAATCGGTCCGCTGGCGACCCCGGACGTTCTGCACTGGACCGACGGTCTGCCGAAACCCGTTT  
TGGTAAAATCATGCGTCTGATCCTGCGTAAAATCGCGGCGGGTGACACCTCTAACCTGGGTGACA  
CCTCTACCCTGGCGGACCCGTCGTTGTTGACAAACTGATCGAAGAAAAACAGGCGATCGCGATG  
CCGTCTCTCGAGCACCACCACCACCACCCTGA

**>ACSstab AA**

MAQTHKHPVPPNIAANAWINPEQYEAMYKQSINDPDTFWREQKILDWIKPYTRVKNTSFEPGNV  
SIRWYEDGTLNLAYNCLDRHLEERGDQTAIWEGDDPSESRHITYRELHRDVCRFANVLKALGIK  
KGDVVAIYMPMVPEAAVAMLACARIGAIHSVIFGGFSPEAVAGRIIDSNSRLVITADEGVRAGRS  
IPLKKNVDEALKNPVNTSVEHVIVFKRTGGIDWQEGRDLWWRDLIEKASPEHQPEPMNAEDPLF  
ILYTSGSTGKPKGVLHHTGGYLVYAATTFKYVFDYHPGDIYWCTADVGVVTGHSYLLYGPLACGA  
TTLMFEGVPNWPTPSRMAQVVDKHQVNI LYTAPT AIRALMAEGDKAIEGTD RSSLRILG SVGEPI  
NPEAWEWYWKKIGNERC PVVD TWQ TETGGFMITPLPGAIELKPGSATRPF FGVQ PALVDNEGPN

QEGATEGNLVITDSWPGQARTLYGDHERFEQTYFSTFKGMYFSGDGARRDEDGYWITGRVDDVL  
NVSGHRLGTAEIESALVAHPKIAEAAVVGIPHDIKGQAIYAYVTLNHGEEPSPELYKEVRNWVRK  
EIGPLATPDVLHWTDGLPKTRSGKIMRRILRKIAAGDTSNLGDTSTLADPSVVDKLIIEKQAIAM  
PSLEHHHHHH\*

>ACS19 DNA

ATGGCTCAGACCCACAAACACCCGGTTCGCCGAACATCGCGGCGAACGCGTGGATCAACCCGGA  
ACAGTACGAAGCGATGTACAAACAGTCTATCAACGACCCGGACACCTTCTGGCGTGAACAGGGTA  
AAATCCTGGACTGGATCAAACCGTACACCCGTGTTAAAAACACCTCTTTCGAACCGGGTAACGTT  
TCTATCCGTTGGTACGAAGACGGTACCCTGAACCTGGCGTACAACGCCTGGACCGTCACCTGGA  
AGAACGTGGTACCAGACCGCGATCATCTGGGAAGGTGACGACCCGTCTGAATCTCGTCACATCA  
CCTACCGTGAACCTGCACCGTGACGTTTGCCGTTTCGCGAACGTTCTGAAAGCGCTGGGTATCAAA  
AAAGGTGACGTTGTTGCGATCTACATGCCGATGGTTCGGAAGCGGCGGTTGCGATGCTGGCGTG  
CGCGCGTATCGGTGCGATCCACTCTGTTATCTTCGGTGGTTTCTCTCCGGAAGCGGTTGCGGGTC  
GTATCATCGACTCTAACTCTCGTCTGGTTATCACCGCGGACGAAGGTGTTTCGTGCGGGTCGTTCT  
ATCCCGCTGAAAAAGAACGTTGACGAAGCGCTGAAAAACCCGAACGTTACCTCTGTTGAACACGT  
TATCGTTTTCAAACGTACCGGTGGTGACATCGACTGGCAGGAAGGTCGTGACCTGTGGTGGCGTG  
ACCTGATCGAAAAAGCGTCTCCGGAACACCAGCCGGAACCGATGAACCGGGAAGACCCGCTGTTT  
ATCCTGTACACCTCTGGTTCTACCGGTAAACCGAAAGGTGTTCTGCACACCACCGGTGGTTACCT  
GGTTTACGCGGCGACCACCTTCAAATACGTTTTCTGACTACCACCCGGGTGACATCTACTGGTGCA  
CCGCGGACGTTGGTTGGATTACCGGTACGCGTATCTGCTGTACGGTCCGCTGGCGTGCGGTGCG  
ACCACCCTGATGTTTGAAGGTGTTCCGAACTGGCCGACCCCGTCTCGTATGGCGCAGGTTGTTGA  
CAAACACCAGGTTAACATCCTGTTTACCGCGCCGACCGCGATCCGTGCGCTGATGGCGGAAGGTG  
ACAAAGCGATCGAAGGTACCGACCGTTCTTCTCTGCGTATCCTGGGTTCTACCGGTGAACCGATC  
AACCCGGAAGCGTGGGAATGGTACTGGAAAAAATCGGTAACGAACGTTGCCCGGTTGTTGACAC  
CTGGTGGCAGACCGAAACCGGTGGTTCATGATCACCCCGCTGCCGGGTGCGATCGAACTGAAAC  
CGGGTCTGCGACCCGTCCGTTCTTCGGTGTTCAGCCGGCGCTGGTTGACAACGAAGGTAACCCG  
CAGGAAGGTGCGACCGAAGGTAACCTGGTTATCACCGACTCTTGGCCGGGTGAGGCGCGTACCCT  
GTACGGTGACCACGAACGTTTTCGAACAGACCTACTTCTCTACCTTCAAAGGTATGTACTTCTCTG  
GTGACGGTGCAGCGTCTGACGAAGACGGTTACTACTGGATCACCGGTCGTGTTGACGACGTTCTG  
AACGTTTCTGGTACCGTCTGGGTACCGCGGAAATCGAATCTGCGCTGGTTGCGCACCCGAAAT  
CGCGGAAGCGGCGGTTGTTGGTATCCCGCACGACATCAAAGGTCAGGCGATCTACCGGTACGTTA  
CCCTGAACCACGGTGAAGAACCGTCTCCGGAACGTGACAAAGAAGTTCGTAACCTGGGTTTCGTA  
GAAATCGGTCCGCTGGCGACCCCGGACGTTCTGCACCTGGACCGACGGTCTGCCGAAAACCCGTT  
TGGTAAAATCATGCGTCTGATCCTGCGTAAAATCGCGGCGGGTACACCTCTAACCTGGGTGACA  
CCTCTACCCTGGCGGACCCGTCTGTTGTTGACAAAACCGATCGAAGAAAAACAGGCGATCGCGATG  
CCGCTCTCTCGAGCACCACCACCACCCTGA

>ACS19 AA

MAQTHKHPVPPNIAANAWINPEQYEAMYKQSINDPDTFWREQKILDWIKPYTRVKNTSFEPGNV  
SIRWYEDGTLNLAYNCLDRHLEERGDQTAIWEGDDPSESRHITYRELHRDVCRFANVLKALGIK  
KGDVVAIYMPMVPEAAVAMLACARIGAIHSVIFGGFSPPEAVAGRIIDSNRLVITADEGVRAGRS  
IPLKKNVDEALKPNVNTSVEHVIVFKRTGGDIDWQEGRDLDLWWRDLIEKASPEHQPEPMNAEDPLF  
ILYTSGSTGKPKGVLHTTGGYLVYAATTFKYVFDYHPGDIYWCTADVGWITGHAYLLYGPLACGA  
TTLMEFEGVPNWPTPSRMAQVVDKHQVNILFTAPTALRALMAEGDKAIEGTDRSSLRILGSTGPEI  
NPEAWEWYWKKIGNERC PVVDTWQ TETGGCMITPLPGAIELKPGSATRPFPGVQPALVDNEGNP  
QEGATEGNLVITDSWPGQARTLYGDHERFEQTYFSTFKGMYFSGDGARRDEDGYWITGRVDDVL  
NVSGHRLGTAEIESALVAHPKIAEAAVVGIPHDIKGQAIYAYVTLNHGEEPSPELYKEVRNWVRK  
EIGPLATPDVLHWTDGLPKTRSGKIMRRILRKIAAGDTSNLGDTSTLADPSVVDKPIEEKQAIAM  
PSLEHHHHHH\*



**>RpPduP DNA**

ATGGCACATCACCACCACCATCACGTGGGTACCAATGACGCAAACATCGCCGATGTCGTGACGAA  
GGTCCCTCGGCGAATATGGCGCGCCTGGTGCGGTGTGCGGTGCGCGCGCTGACCGCCAAGAGCCCCG  
ACGGGAAAAGCAACTCGTCCGCCGATGCGGATGTGGTGCGCCGGATGGTGGCCAAGGCGATCCGC  
GACCACGCCGGAAC TGCAGCCGTCCGGTAACGCCGCGACGTCGTGCGCGGCGGTGAGCGATGG  
CGTGTTCGAGACCATGGATGCCGCGGTGAGGCGCTGCTCTGGCGCAGCAGCAATACCTGCTTT  
GCTCGATGTCCGACCGCGCGCGCTTCGTGCAGGGAATCCGCGACGTCATCTTGAATCAGGATACG  
CTCGAAAAGATGTCCCGCATGGCGGTGCGAAGAAACCGGCATGGGCAATTACGAGCATAAGCTGAT  
CAAGAACC GGCTAGCCGGCGAAAAGACCCCGGCATCGAAGATCTCACCACCGACGCTTTTCAGCG  
GCGACAACGGTCTGACGCTGGTGGAACTACTCGCCGTTCCGGGGTATCGGCGCGATCACGCCGACC  
ACCAATCCGACGGAACCATCGTCTGCAATTCGATCGGAATGCTGGCGGCCGGCAACAGCGTGGT  
GTTTCAGCCCGCATCCGCGCGCCCGGCAGGTGTGCTGCTGCTGGTCCGCCTGATCAACCAGAAGC  
TGGCAGCGCTCGGCGCGCCGAAAACCTGGTGGTGACCGTGGAGAAGCCCTCGATCGAGAACACC  
AACGCCATGATGGCGCATCCCAAGGTGCGGATGCTGGTTGCCACCGGCGGCCCGCCATCGTCAA  
GGCGGTGCTGTGACCGGCAAGAAGGCGATCGGCGCCGGCGCCGGCAATCCGCCCGTTCGTGGTTCG  
ACGAAACCGCCAACATCGAAAAGCCGCCTGCGACATCGTCAATGGCTGCAGCTTCGACAACAAC  
CTGCCCTGCGTGC CGGAGAAGGAGATCATCGCAGTCGCCAGATCGCCGATTACCTGATCTTCAA  
CTTGAAGAAGAACGGCGCCTACGAGATCAAGGATCCGGCGGTTCTGCAGCAACTGCAGGACCTGG  
TGCTGACCGCCAAGGGCGGGCCACAGACCAATGCGTCGGCAAGAGTGC GGTGTGGCTGCTGTGCG  
CAGATCGGCATCAGCGTCGACGCCAGCATCAAGATCATCCTGATGGAAGTGCCGCGGGAACATCC  
CTTCGTGCAGGAAGAACTGATGATGCCGATCCTGCCGCTGGTCCGGGTCGAAACCGTGGATGATG  
CGATCGACCTCGCCATCGAGGTGGAGCACGACAATCGCCACACCGCGATCATGCATTCACCGAT  
GTGCGCAAGCTCACCAAGATGGCCAAGCTGATCCAGACCAGATCTTCGTGAAGAACGGCCCGTC  
TTATGCGGGGCTCGGCGCCGGCGGCGAGGGATATCCACCTTCACCATCGCGGGTCCCACGGGCG  
AGGGCCTGACCTCGGCGAAGTCGTTCGCGCGCCGCCGCAATGCGTGATGGTGGAAAGCGCTCAAT  
ATCCGTTGA

**>RpPduP AA**

MAHHHHHHVGTNDANIADVVTKVLGEYGAPGAVSVAAL TAKSPDGKSNSSADADVARMVAKAIR  
DHAGTAQPSGNAATSSAAVSDGVFETMDAAVEAAAALAQOYLLCSMSDRARFVQGI RDVILNQDT  
LEKMSRMAVEETGMGNYEKLIKRLAGEKTPGIEDLTDAFSGDNGLTLVEYSPFGVIGAITPT  
TNPTETIVCNSIGMLAAGNSVVFSPHPRARQVSLLLVRLINQKLAALGAPENLVVTV EKPSIENT  
NAMMAHPKVRMLVATGGPAIVKAVLSTGKKAIGAGAGNPPVVVDE TANI EKAACDIVNGCSFDNN  
LPCVAEKEIIA VAQIADYLI FNLKKN GAYEIKDPAVLQQLQDLVLTAKGGPQTKCVGKSAVWLLS  
QIGISVDASIKIILMEVPREHPFVQEELMMPILPLVRVETVDDAIDL AIEVEHDNRHTAIMHSTD  
VRKLTMAKLIQTTIFVKNGPSYAGLGAGGEGYSTFTIAGPTGEGLTS AKSFARRRKCVMVEALN  
IR

**>Pdup-NP DNA**

ATGGCACATCACCACCACCATCACGTGGGTACCAATGACGCAAACATCGCCGATGTCGTGACGAA  
GGTCCCTCGGCGAATATGGCGCGCCTGGTGCGGTGTGCGGTGCGCGCGCTGACCGCCAAGAGCCCCG  
ACGGGAAAAGCAACTCGTCCGCCGATGCGGATGTGGTGCGCCGGATGGTGGCCAAGGCGATCCGC  
GACCACGCCGGAAC TGCAGCCGTCCGGTAACGCCGCGACGTCGTGCGCGGCGGTGAGCGATGG  
CGTGTTCGAGACCATGGATGCCGCGGTGAGGCGCTGCTCTGGCGCAGCAGCAATACCTGCTTT  
GCTCGATGTCCGACCGCGCGCGCTTCGTGCAGGGAATCCGCGACGTCATCTTGAATCAGGATACG  
CTCGAAAAGATGTCCCGCATGGCGGTGCGAAGAAACCGGCATGGGCAATTACGAGCATAAGCTGAT  
CAAGAACC GGCTAGCCGGCGAAAAGACCCCGGCATCGAAGATCTCACCACCGACGCTTTTCAGCG  
GCGACAACGGTCTGACGCTGGTGGAACTACTCGCCGTTCCGGGGTATCGGCGCGATCACGCCGACC  
ACCAATCCGACGGAACCATCGTCTGCAATTCGATCGGAATGCTGGCGGCCGGCAACAGCGTGGT  
GTTTCAGCCCGCATGGACGCGCCCGGCAGGTGTGCTGCTGCTGGTCCGCCTGATCAACCAGAAGC

TGGCAGCGCTCGGCGCGCCGAAAACCTGGTGGTGACCGTGGAGAAGCCCTCGAGAGAGAACACC  
CTTGCCATGATGGCGCATCCCAAGGTGCGGATGCTGGTTGCCACCGGCGGCCCGCCCTCGTCAA  
GGCGGTGCTGTGCGACCGCAAGAAGGCGATCGGCGCGGGCGCCGGCAATCCGCCCGTCTGTGGTCG  
ACGAAACCGCCAACATCGAAAAAGCCGCCTGCGACATCGTCAATGGCTGCAGCTTCGACAACAAC  
CTGCCCTGCGTGCCTGAGAAGGAGATCATCGCAGTCCCGCAGATCGCCGATTACCTGATCTTCAA  
CTTGAAGAAGAACGGCGCCTACGAGATCAAGGATCCGGCGGTCTGCAGCAACTGCAGGACCTGG  
TGCTGACCGCCAAGGGCGGGCCACAGACCAATGCGTCGGCAAGAGTGCGGTGTGGCTGCTGTTCG  
CAGATCGGCATCAGCGTCGACGCCAGCATCAAGATCATCCTGATGGAAGTGCCGCGGGAACATCC  
CTTCGTGCAGGAAGAACTGATGATGCCGATCCTGCCGCTGGTCCGGTTCGAAACCGTGGATGATG  
CGATCGACCTCGCCATCGAGGTGGAGCACGACAATCGCCACACCGCGATCATGCATTCACCGAT  
GTGCGCAAGCTCACCAAGATGGCCAAGCTGATCCAGACCAGATCTTCGTGAAGAACGGCCCGTC  
TTATGCGGGGCTCGGCGCCGGCGGCGAGGGATATTCACCTTCACCATCGCGGGTCCACGGGCG  
AGGGCTGACCTCGGCGAAGTTCGTCGCGCCCGCCGCAATGCGTGATGGTGGAAGCGCTCAAT  
ATCCGTTGA

### >Pdup-NP AA

MAHHHHHHVGTNDANIADVTKVLGEYGAPGAVSVAALTAKS PDGKSNSSADADV VARMVAKAIR  
DHAGTAQPSGNAATSSAAVSDGVFETMDAAVEAAAALAQOYLLCSMSDRARFVQGI RDVILNQDT  
LEKMSRMAVEETGMGNYEHLIKNRLAGEKTPGIEDLTTFDAFSGDNGLTLVEYSPFGVIGAITPT  
TNPTETIVCNSIGMLAAGNSVVFSPHGRARQVSLLLVRLINQKLAALGAPENLVVTVEKPSRENT  
LAMMAHPKVRMLVATGGPALVKAVLSTGKKAIGAGAGNPPVVDDETANIEKAACDIVNGCSFDNN  
LPCVAEKEIIAQAQIADYLI FNLKKN GAYEIKDPAVLQQLQDLVLTAKGQPQTKCVGKSAVWLLS  
QIGISVDASIKIILMEVPREHPFVQEE LMMPILPLVRVETVDDAIDLAI E VEHDNRHTAIMHSTD  
VRKLTKMAKLIQTTFVKNGPSYAGLGAGGEGYSTFTIAGPTGEGLTSAKSFARRRKCVMEALN  
IR

### >GCR DNA

ATGGCACATCACCACCACCATCACGTGGGTACCAATGACGCAAACATCGCCGATGTCGTGACGAA  
GGTCTCGGCGAATATGGCGCGCCTGGTTCGGTTCGGTCGCGGCGCTGACCGCCAAGAGCCCCG  
ACGGGAAAAGCAACTCGTCGCCGATGCGGATGTGGTCGCCCCGATGGTGGCCAAGGCGATCCGC  
GACCACGCCGAACTGCGCAGCCGTCCGGTAACGCCGCGACGTCGTTCGGCGGCGGTCAGCGATGG  
CGTGTTCGAGACCATGGATGCCGCGGTCGAGGCCGCTGCTCTGGCGCAGCAGCAATACCTGCTTT  
GCTCGATGTCCGACCGCGCGGCTTCGTGCAGGGAATCCGCGACGTCATCTTGAAATCAGGATACG  
CTCGAAAAGATGTCCCGCATGGCGGTGCAAGAAAACCGGCATGGGCAATTACGAGCATAAGCTGAT  
CAAGAACCGGCTAGCCGGCGAAAAGACCCCGGCATCGAAGATCTCACCACCGACGCTTTCAGCG  
GCGACAACGGTCTGACGCTGGTGGAACTACTCGCCGTTTCGGGGTGATCGGCGCGATCACGCCGACC  
ACCAATCCGACGGAAACCATCGTCTGCAATTTCGATCGGAATGCTGGCGGCGCGCAACAGCGTGGT  
GTTTCAGCCCGCATGGACCGCGCCCGCAGGTGTCGCTGCTGCTGGTCCGCCTGATCAACCAGAAGC  
TGGCAGCGCTCGGCGCGCCGAAAACCTGGTGGTGACCGTGGAGAAGCCCTCGAGAGAGAACACC  
CTTGCCATGATGGCGCATCCCAAGGTGCGGATGCTGGTTGCCACCGGCGGCCCGCCCTCGTCAA  
GGCGGTGCTGTGCGACCGCAAGAAGGCGATCGGCGCGGGCGCCGGCAATCCGCCCGTCTGTGGTCG  
ACGAAACCGCCAACATCGAAAAAGCCGCCTGCGACATCGTCAATGGCTGCAGCTTCGACAACAAC  
ATAACCTGCACTGCCGAGAAGGAGATCATCGCAGTCCCGCAGATCGCCGATTACCTGATCTTCAA  
CTTGAAGAAGAACGGCGCCTACGAGATCAAGGATCCGGCGGTCTGCAGCAACTGCAGGACCTGG  
TGCTGACCGCCAAGGGCGGGCCACAGACCAATGCGTCGGCAAGAGTGCGGTGTGGCTGCTGTTCG  
CAGATCGGCATCAGCGTCGACGCCAGCATCAAGATCATCCTGATGGAAGTGCCGCGGGAACATCC  
CTTCGTGCAGGAAGAACTGATGATGCCGATCCTGCCGCTGGTCCGGTTCGAAACCGTGGATGATG  
CGATCGACCTCGCCATCGAGGTGGAGCACGACAATCGCCACACCGCGATCATGCATTCACCGAT  
GTGCGCAAGCTCACCAAGATGGCCAAGCTGATCCAGACCAGATCTTCGTGAAGAACGGCCCGTC  
TTATGCGGGGCACGGCGCCGGCGGCGAGGGATATTCACCTTCACCATCGCGGGTCCACGGGCG

AGGGCCTGACCTCGGCGAAGTCGTTTCGCGCGCCGCCGCAAATGCGTGATGGTGGGAAGCGCTCAAT  
ATCCGTTGA

>GCR AA

MAHHHHHHVGTNDANIADVVTKVLGEYGAPGAVSVAALTAKSPDGKSNSSADADV  
ARMVAKAIRDHAGTAQPSGNAATSSAAVSDGVFETMDAAVEAAALAQQQYLLCSMS  
DRARFVQGIRDVILNQDTLEKMSRMAVEETGMGNIEHKLINRLAGEKTPGIEDLTTD  
AFSGDNGLTLVEYSPFGVIGAITPTTNPTETIVCNSIGMLAAGNSVVFSPHGRARQVSL  
LLVRLINQKLAALGAPENLVVTVEKPSRENTLAMMAHPKVRMLVATGGPALVKAVLS  
TGKKAIGAGAGNPPVVVDETANIEKAACDIVNGCSFDNNITCTAEKEIIAVAQIADYLIF  
NLKKNAYEIKDPAVLQQLQDLVLTAKGGPQTKCVGKSAVWLLSQIGISVDASIKIILM  
EVPREHPFVQEELMMPILPLRVETVDDAIDLAIEVEHDNRHTAIMHSTDVRKLTMAK  
LIQTTIFVKNGPSYAGHGAGGEGYSTFTIAGPTGEGLTSAKSFARRRKCVMVEALNIR

## Supplemental References

1. Reger AS, Carney JM, Gulick AM (2007) Biochemical and crystallographic analysis of substrate binding and conformational changes in acetyl-CoA synthetase. *Biochemistry* 46(22):6536–6546.
2. Kabsch W (2010) Xds. *Acta Crystallogr Sect D Biol Crystallogr* 66(2):125–132.
3. Zarzycki J, Sutter M, Cortina NS, Erb TJ, Kerfeld CA (2017) In vitro reconstitution of the core chemistry of a glycy radical enzyme- Associated bacterial microcompartment. *Sci Rep* 7:42757.
4. Adams PD, et al. (2010) PHENIX: a comprehensive Python-based system for macromolecular structure solution. *Acta Crystallogr Sect D Biol Crystallogr* 66(2):213–221.
5. Emsley P, Cowtan K (2004) Coot: model-building tools for molecular graphics. *Acta Crystallogr Sect D Biol Crystallogr* 60(12):2126–2132.
